# Supplementary material
Source: ML conference proceedings conference paper supplement (https://openaccess.thecvf.com/content/CVPR_2020/html/Rolinek_Optimizing_Rank-Based_Metrics_CVPR_2020_paper.html)
Supplement: Supplementary file 1 [file Rolinek_Optimizing_Rank-Based_Metrics_CVPR_2020_supplemental.pdf]

# Optimizing Rank-based Metrics with Blackbox Differentiation

## Supplementary Material

### A. Parameters of retrieval experiments

In all experiments we used the ADAM optimizer with a weight decay value of  $4 \times 10^{-4}$  and batch size 128. All experiments ran at most 80 epochs with a learning rate drop by 70% after 35 epochs and a batch memory of length 3. We used higher learning rates for the embedding layer as specified by defaults in Cakir et al. [5].

We used a super-label batch preparation strategy in which we sample a consecutive batches for the same super-label pair, as specified by Cakir et al. [5]. For the In-shop Clothes dataset we used 4 batches per pair of super-labels and 8 samples per class within a batch. In the Online Products dataset we used 10 batches per pair of super-labels along with 4 samples per class within a batch. For CUB200, there are no super-labels and we just sample 4 examples per classes within a batch. These values again follow Cakir et al. [5]. The remaining settings are in Table 1.

|           | Online Products    | In-shop   | CUB200             |
|-----------|--------------------|-----------|--------------------|
| $lr$      | $3 \times 10^{-6}$ | $10^{-5}$ | $5 \times 10^{-6}$ |
| margin    | 0.02               | 0.05      | 0.02               |
| $\lambda$ | 4                  | 0.2       | 0.2                |

Table 1: Hyperparameter values for retrieval experiments.

### B. Proofs

**Lemma 1.** *Let  $\{w_k\}$  be a sequence of nonnegative weights and let  $r_1, \dots, r_n$  be positive integers. Then*

$$\sum_{k=1}^{\infty} w_k |\{i : r_i \geq k\}| = \sum_{i=1}^n W(r_i), \quad (1)$$

where

$$W(k) = \sum_{i=1}^k w_i \quad \text{for } k \in \mathbb{N}. \quad (2)$$

Note that the sum on the left hand-side of (1) is finite.

**Proposition 2.** *Let  $w_K$  be nonnegative weights for  $K \in \mathbb{N}$  and assume that  $L_{rec}$  is given by*

$$L_{rec}(\mathbf{y}, \mathbf{y}^*) = \sum_{K=1}^{\infty} w_K L@K(\mathbf{y}, \mathbf{y}^*). \quad (3)$$

Then

$$L_{rec}(\mathbf{y}, \mathbf{y}^*) = \frac{1}{|\text{rel}(\mathbf{y}^*)|} \sum_{i \in \text{rel}(\mathbf{y}^*)} W(r_i), \quad (4)$$

where  $W$  is as in (2).

*Proof.* Taking the complement of the set  $\text{rel}(\mathbf{y}^*)$  in the definition of  $L@K$ , we get

$$L@K(\mathbf{y}, \mathbf{y}^*) = \frac{|\{i \in \text{rel}(\mathbf{y}^*) : r_i \geq K\}|}{|\text{rel}(\mathbf{y}^*)|}, \quad (5)$$

whence (3) reads as

$$L_{rec}(\mathbf{y}, \mathbf{y}^*) = \frac{1}{|\text{rel}(\mathbf{y}^*)|} \sum_{k=1}^{\infty} w_k |\{i : r_i \geq k\}|.$$

Equation (4) then follows by Lemma 1.  $\square$

*proof of Lemma 1.* Observe that  $w_k = W(k) - W(k-1)$  and  $W(0) = 0$ . Then

$$\begin{aligned} \sum_{i=1}^n W(r_i) &= \sum_{k=1}^{\infty} W(k) |\{i : r_i = k\}| \\ &= \sum_{k=1}^{\infty} W(k) |\{i : r_i \geq k\} \setminus \{i : r_i \geq k+1\}| \\ &= \sum_{k=1}^{\infty} W(k) |\{i : r_i \geq k\}| \\ &\quad - \sum_{k=1}^{\infty} W(k-1) |\{i : r_i \geq k\}| \\ &= \sum_{k=1}^{\infty} (W(k) - W(k-1)) |\{i : r_i \geq k\}| \\ &= \sum_{k=1}^{\infty} w_k |\{i : r_i \geq k\}| \end{aligned}$$

and (1) follows.  $\square$

*Proof of (20).* Let us set  $w_k = \log(1 + 1/k)$  for  $k \in \mathbb{N}$ . Then from Taylor's expansion of log we have the desired  $w_k \approx \frac{1}{k}$  and

$$\begin{aligned} W(k) &= \sum_{i=1}^k \log\left(1 + \frac{1}{i}\right) \\ &= \log\left(\prod_{i=1}^k \frac{1+i}{i}\right) = \log(1+k). \end{aligned}$$

If we set

$$w_k = \log \left( 1 + \frac{\log \left( 1 + \frac{1}{k} \right)}{1 + \log k} \right), \quad \text{for } k \in \mathbb{N}$$

then, using Taylor’s expansions again,

$$w_k \approx \frac{\log \left( 1 + \frac{1}{k} \right)}{1 + \log k} \approx \frac{1}{k \log k}$$

and

$$\begin{aligned} W(k) &= \sum_{i=1}^k \log \left( 1 + \frac{\log \left( 1 + \frac{1}{k} \right)}{1 + \log k} \right) \\ &= \log \left( \prod_{i=1}^k \frac{1 + \log(1 + i)}{1 + \log i} \right) \\ &= \log(1 + \log(1 + k)). \end{aligned}$$

The conclusion then follows by Proposition 2. □

### C. Ranking surrogates visualization

For the interested reader, we additionally present visualizations of smoothing effects introduced by different approaches for direct optimization of rank-based metrics. We

display the behaviour of our approach using blackbox differentiation [60], of FastAP [4], and of SoDeep [10].

In the following, we fix a 20-dimensional score vector  $w \in \mathbb{R}^{20}$  and a loss function  $L$  which is a (random but fixed) linear combination of the ranks of  $w$ . We plot a (random but fixed) two-dimensional section of  $\mathbb{R}^{20}$  of the loss landscape  $L(w)$ . In Fig. 2a we see the true piecewise constant function. In Fig. 2b, Fig. 2c and Fig. 2d the ranking is replaced by interpolated ranking [60], FastAP soft-binning ranking [4] and by pretrained SoDeep LSTM [10], respectively. In Fig. 1a and Fig. 1b the evolution of the loss landscape with respect to parameters is displayed for the blackbox ranking and FastAP.

### Acknowledgement

We thank the International Max Planck Research School for Intelligent Systems (IMPRS-IS) for supporting Marin Vlastelica and Claudio Michaelis. We acknowledge the support from the German Federal Ministry of Education and Research (BMBF) through the Tübingen AI Center (FKZ: 01IS18039B). Claudio Michaelis was supported by the Deutsche Forschungsgemeinschaft (DFG, German Research Foundation) via grant EC 479/1-1 and the Collaborative Research Center (Projektnummer 276693517 – SFB 1233: Robust Vision).

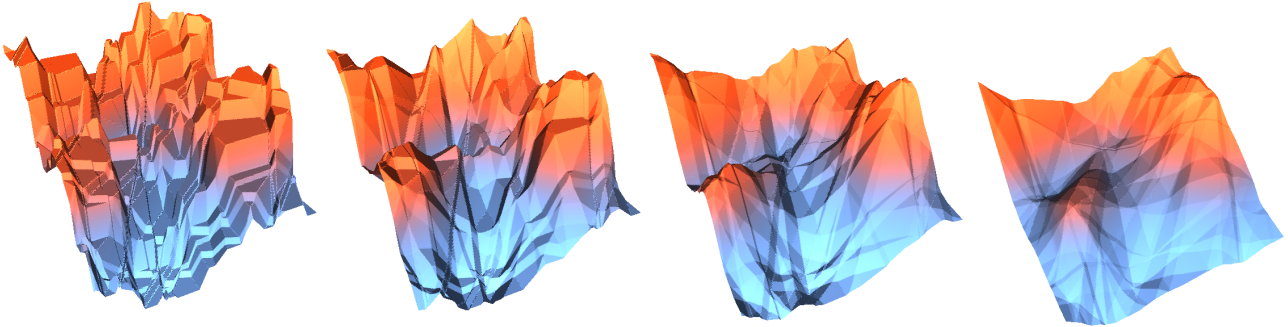

(a) Ranking interpolation by [60] for  $\lambda = 0.2, 0.5, 1.0, 2.0$ .

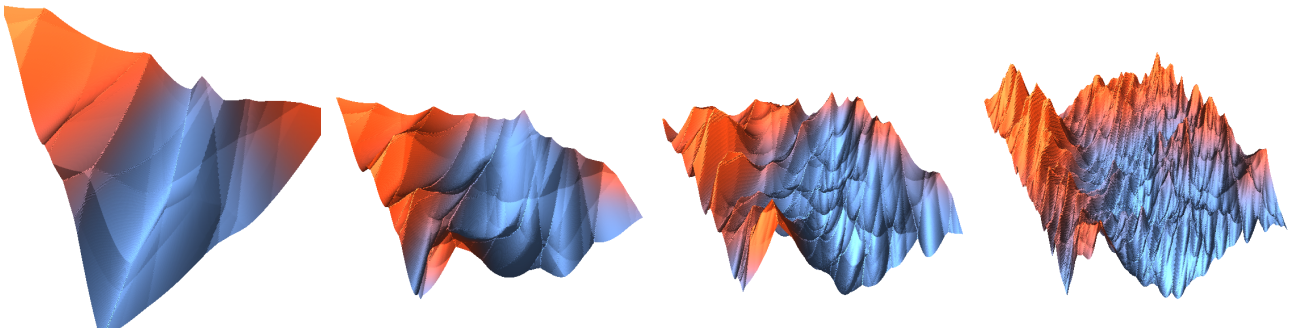

(b) FastAp [4] with bin counts 5, 10, 20, 40.

Figure 1: Evolution of the ranking-surrogate landscapes with respect to their parameters.

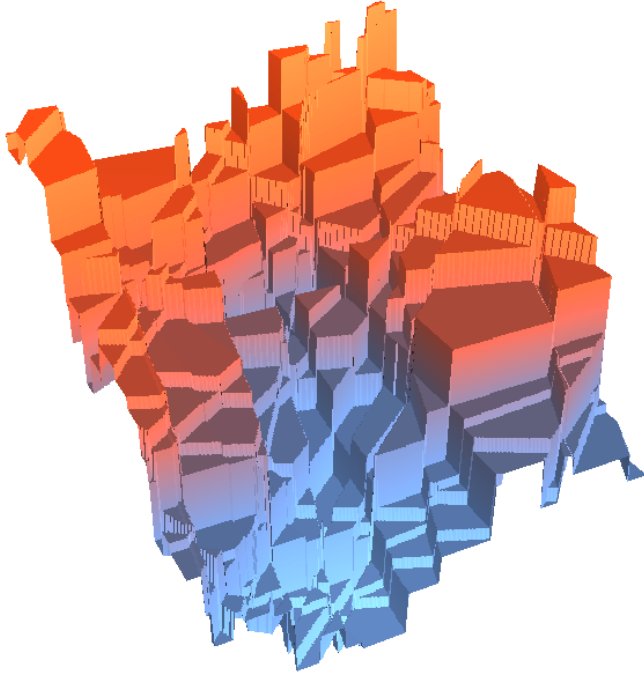

(a) Original piecewise constant landscape

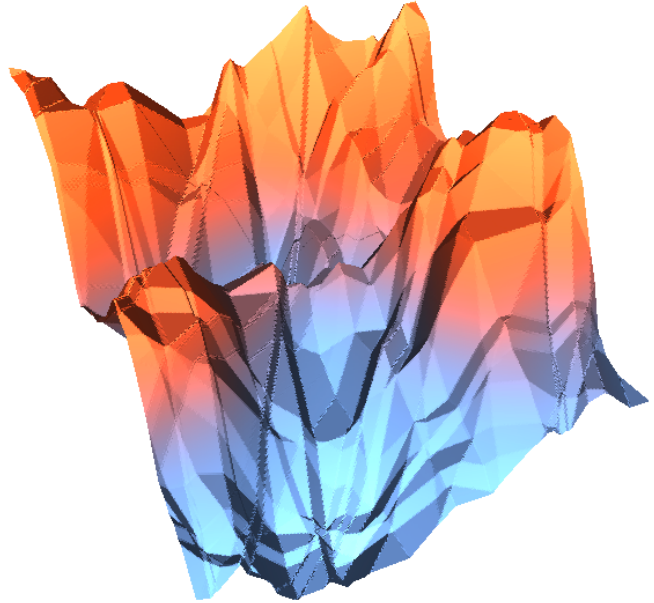

(b) Piecewise linear interpolation scheme of [60] with  $\lambda = 0.5$

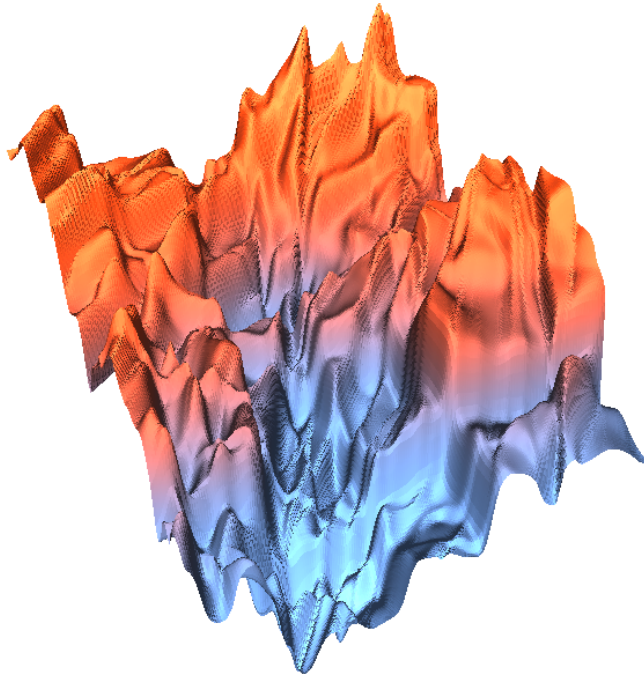

(c) SoDeep LSTM-based ranking surrogate [10]

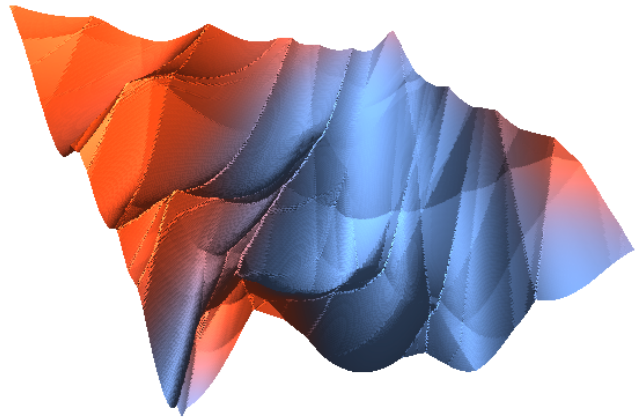

(d) FastAP [4] soft-binning with 10 bins.

Figure 2: Visual comparison of various differentiable proxies for piecewise constant function.
